# Supplementary material for: Side Effects and Perceptions Following COVID-19 Vaccination in Jordan: A Randomized, Cross-Sectional Study Implementing Machine Learning for Predicting Severity of Side Effects
Source: MDPI journal article supplement (doi:10.3390/vaccines9060556), 2021-05-26
Supplement: s1

## Survey of Side Effects and Opinions Following COVID-19 Vaccination in Jordan

- This survey aims to study the side effects appeared after receiving COVID-19 vaccines in Jordan.
- This survey aims to study the opinions of people who received COVID-19 vaccines in Jordan.
- This survey targets everyone received the first or second dose of any COVID-19 vaccines in Jordan (regardless of the ethnicity, nationality, age, educational level...etc.).
- Elderly participants can ask a trusted person to assist, or to answer on behalf of them if necessary.
- This survey does not include the names or identifying information about the participants.

---

### SECTION 1: Participant consent

By participating in this study, you are contributing in the awareness-raising efforts about the safety and protection of COVID-19 vaccines, and thus you will help others to protect themselves and to refute any false rumors about these vaccines.

**Do you agree to participate in this study?**

- ☐ Yes
- ☐ No

---

### SECTION 2: Participant information

**1. Gender:**

- ☐ Male
- ☐ Female

**2. Age category:**

- ☐ Less than 20 years
- ☐ 20 - 29 years
- ☐ 30 - 39 years
- ☐ 40 - 49 years

- € 50 - 59 years
- € 60 years or more

**3. Educational level:**

- € High school or less
- € A Diploma or a Bachelor's degree
- € Postgraduate studies

**4. Are you a healthcare worker?**

- € Yes
- € No

**5. Place of residence:**

- € A city
- € A village (rural living)
- € Badia (semi-desert region)
- € A refugee camp

**6. Are you suffering from any of chronic diseases?**

*(You can select more than one choice)*

- € No
- € Diabetes mellitus
- € Hypertension
- € Cardiovascular diseases
- € Chronic respiratory diseases
- € Obesity
- € Joint inflammations
- € Osteoporosis
- € Autoimmune diseases
- € Thyroid disorders
- € Osteoporosis
- € Cancer
- € Other diseases (please specify): .....

**7. Are you a smoker (cigarettes or shisha)?**

☐ Yes

☐ No

**8. Are you suffering from an allergy to any types of foods or medicines?**

☐ Yes

☐ No

**9. Have you been infected with COVID-19 before vaccination?**

☐ Yes

☐ No

**10. Did you feel scared to receive a COVID-19 vaccine before vaccination?**

☐ Yes

☐ No

**11. Before vaccination, which type of COVID-19 vaccines did you prefer?**

☐ AstraZeneca/Oxford

☐ Pfizer-BioNTech

☐ Sinopharm

☐ Johnson & Johnson

☐ Moderna

☐ Sputnik V

☐ Covaxin

☐ I have no preference

**12. How did you know about COVID-19 vaccines?**

☐ Government-owned media platforms

☐ Social media platforms

☐ Friends and relatives

☐ Scientific and medical websites

☐ I have no information

**13. Which type of COVID-19 vaccines have you received?**

- € AstraZeneca/Oxford
- € Pfizer-BioNTech
- € Sinopharm
- € Johnson & Johnson
- € Moderna
- € Sputnik V
- € Covaxin

**14. How many doses have you received so far?**

- € Single dose
- € Two doses

**15. Have you got infected with COVID-19 after vaccination?**

- € Yes
- € No

**16. Do you think that COVID-19 vaccines are safe in the long term?**

- € Yes
- € No

**17. Do you feel more reassured after vaccination?**

- € Yes
- € No

**18. Do you think that the following of sterilization and social distance measures, as well as wearing medical face masks, is still necessary after vaccination?**

- € Yes
- € No

**19. Are you monitoring your vital signs more frequent after vaccination?**

- € Yes
- € No

**20. Do you advice others to get vaccinated for COVID-19?**

☐ Yes

☐ No

**21. Have you noticed any symptoms following vaccination?**

☐ No symptoms at all (*submit your answers*)

☐ Yes, mild symptoms (*complete the next section*)

☐ Yes, moderate symptoms (*complete the next section*)

☐ Yes, severe symptoms (*complete the next section*)

---

**SECTION 3: Symptoms recorded after vaccination**

(Please note that these symptoms should be appeared suddenly and without known causes).

**22. Have you felt tiredness and fatigue?**

☐ Yes

☐ No

**23. Have you experienced decreased sleep quality?**

☐ Yes

☐ No

**24. Have you felt a fever?**

☐ Yes

☐ No

**25. Have you felt a headache?**

☐ Yes

☐ No

**26. Have you experienced haziness or lack-of-clarity in your eyesight?**

☐ Yes

☐ No

**27. Have you experienced pain or swelling at the injection site?**

☐ Yes

☐ No

**28. Have you felt joints pain?**

☐ Yes

☐ No

**29. Have you experienced swollen ankles and feet?**

☐ Yes

☐ No

**30. Have you felt muscle pain (myalgia)?**

☐ Yes

☐ No

**31. Have you felt nausea?**

☐ Yes

☐ No

**32. Have you felt abdominal pain?**

☐ Yes

☐ No

**33. Have you experienced diarrhea?**

☐ Yes

☐ No

**34. Have you experienced vomiting?**

☐ Yes

☐ No

**35. Have you noticed any bruises on your body?**

☐ Yes

☐ No

**36. Have you experienced bleeding gums?**

☐ Yes

☐ No

**37. Have you experienced a nosebleed?**

☐ Yes

☐ No

**38. Have you felt chills?**

☐ Yes

☐ No

**39. Have you experienced irritation and allergic skin reactions, or itchy skin?**

☐ Yes

☐ No

**40. Have you noticed that your body sweats for no reason?**

☐ Yes

☐ No

**41. Have you felt cold, numbness and tingling in limbs?**

☐ Yes

☐ No

**42. Have you felt dizzy?**

☐ Yes

☐ No

**43. Have you felt a clogged nose?**

☐ Yes

☐ No

**44. Have you felt a runny nose?**

☐ Yes

☐ No

**45. Have you felt dyspnea?**

☐ Yes

☐ No

**46. Have you felt chest pain?**

☐ Yes

☐ No

**47. Have you felt over sleepiness or laziness?**

☐ Yes

☐ No

**48. Have you felt faster or irregular heartbeats?**

☐ Yes

☐ No

**49. Have you experienced an increase or decrease in blood pressure?**

☐ Yes

☐ No

**50. Have you felt a sore or dry throat?**

☐ Yes

☐ No

**51. Have you experienced a cough?**

☐ Yes

☐ No

**52. How soon did the symptoms appear after injection with a COVID-19 vaccine?**

☐ Up to 4 hours

☐ 5 to 8 hours

☐ 9 to 12 hours

☐ 13 to 16 hours

☐ 17 to 20 hours



€ 21 to 24 hours

**53. How long did the symptoms last?**

€ Less than one day

€ 1 to 3 days

€ 4 to 7 days

€ More than 7 days

**54. Please write down any other symptoms you have experienced:**

*(optional)*

.....  
.....

**55. How did you act to relieve the symptoms that appeared after vaccination?**

€ I took a rest at home (*submit your answers*)

€ I took painkillers while staying rested at home (*submit your answers*)

€ I went to a doctor's clinic, but there was no need for hospitalization (*answer the next section*)

€ I have been admitted to a hospital, and I received the required healthcare services (*answer the next question*)

---

---

**SECTION 4: After visiting a doctor or hospital**

**56. Please write down those symptoms caused a visit to doctor or hospitalization:**

.....  
.....

**57. Have you been diagnosed with any types of thrombosis (blood clots)?**

€ Yes

€ No

**58. Have you been diagnosed with low platelet count (thrombocytopenia)?**

€ Yes

€ No
